# Supplementary material
Source: publisher figshare collection journal article supplement (https://sage.figshare.com/ndownloader/files/13748465)
Supplement: Supplementary file 1 [file 13748465]

**SUPPLEMENTAL APPENDIX:  
BIVARIATE CROSS-TABULATIONS FOR ALL SIGNIFICANT ASSOCIATIONS  
BETWEEN THE INDEPENDENT AND DEPENDENT VARIABLES**

***A. Aspiration***

**Table A-1:  
Age (by Decade) and Aspiration**

|                                                                                         |                                                                                     | <b>18-25</b>     | <b>26-35</b>     | <b>36-45</b>     | <b>46-55</b>     | <b>56-65</b>     | <b>66-75</b>     | <b>76+</b>     |
|-----------------------------------------------------------------------------------------|-------------------------------------------------------------------------------------|------------------|------------------|------------------|------------------|------------------|------------------|----------------|
| <b>--No prior/present aspiration</b><br>--No present likelihood                         | 1. "No, I have not and realistically do not expect to do so"                        | 36.4%            | 53.7%            | 48.1%            | 56.5%            | 70.5%            | 78.1%            | 85.3%          |
| <b>--No, prior/present aspiration</b><br>--Yes potential aspiration                     | 2. "No, I have not but if a special opportunity arose to do so I would consider it" | 11.9%            | 7.5%             | 10.7%            | 5.6%             | 10.5%            | 4.4%             | 2.9%           |
| <b>--Yes prior/present aspiration</b><br>--No present likelihood                        | 3. "Yes, I have but I do not realistically think it will happen"                    | 20.3%            | 20.9%            | 12.2%            | 14.5%            | 10.0%            | 13.2%            | 11.8%          |
| <b>--Yes, prior/present aspiration</b><br>--Yes potential aspiration                    | 4. "Yes, I have and if a special opportunity arose to do so I would consider it"    | 21.0%            | 12.7%            | 18.3%            | 18.5%            | 6.8%             | 3.5%             | 0.0%           |
| <b>--Yes prior/present aspiration</b><br>--Yes present desire                           | 5. "Yes, I have and I want to find a way to make it happen someday"                 | 9.1%             | 4.5%             | 9.9%             | 3.2%             | 2.1%             | 0.9%             | 0.0%           |
| <b>--Yes prior/present aspiration</b><br>--Yes present likelihood<br>--Yes present plan | 6. "Yes, I have and have already begun making plans to do so"                       | 1.4%             | 0.7%             | 0.8%             | 1.6%             | 0.0%             | 0.0%             | 0.0%           |
| <b>N=870</b>                                                                            |                                                                                     | N=143<br>(16.4%) | N=134<br>(15.4%) | N=131<br>(15.1%) | N=124<br>(14.3%) | N=190<br>(21.8%) | N=114<br>(13.1%) | N=34<br>(3.9%) |

\* Chi-square ( $\chi^2$ ) = 108.002,  $p < .001$ .

**Table A-2:  
Northeast U.S. Region of Residence (Dummy) and Aspiration**

|                                                                                  |                                                                                     | <b>Not Northeast</b>     | <b>Northeast</b>         |
|----------------------------------------------------------------------------------|-------------------------------------------------------------------------------------|--------------------------|--------------------------|
| --No prior/present aspiration<br>--No present likelihood                         | 1. "No, I have not and realistically do not expect to do so"                        | 59.4%                    | 53.6%                    |
| --No, prior/present aspiration<br>--Yes potential aspiration                     | 2. "No, I have not but if a special opportunity arose to do so I would consider it" | 8.9%                     | 6.0%                     |
| --Yes prior/present aspiration<br>--No present likelihood                        | 3. "Yes, I have but I do not realistically think it will happen"                    | 15.0%                    | 14.6%                    |
| --Yes, prior/present aspiration<br>--Yes potential aspiration                    | 4. "Yes, I have and if a special opportunity arose to do so I would consider it"    | 11.4%                    | 19.9%                    |
| --Yes prior/present aspiration<br>--Yes present desire                           | 5. "Yes, I have and I want to find a way to make it happen someday"                 | 4.4%                     | 6.0%                     |
| --Yes prior/present aspiration<br>--Yes present likelihood<br>--Yes present plan | 6. "Yes, I have and have already begun making plans to do so"                       | 0.8%                     | 0.0%                     |
| <b>N=871</b>                                                                     |                                                                                     | <b>N=720<br/>(82.7%)</b> | <b>N=151<br/>(17.3%)</b> |

\* Chi-square ( $\chi^2$ ) = 10.858,  $p < .05$ .

**Table A-3:**  
**Political Ideology (Recoded) and Aspiration**

|                                                                                         |                                                                                     | <b>Liberal</b>   | <b>Moderate</b>  | <b>Conservative</b> |
|-----------------------------------------------------------------------------------------|-------------------------------------------------------------------------------------|------------------|------------------|---------------------|
| <b>--No prior/present aspiration</b><br>--No present likelihood                         | 1. "No, I have not and realistically do not expect to do so"                        | 43.8%            | 64.8%            | 63.0%               |
| <b>--No, prior/present aspiration</b><br>--Yes potential aspiration                     | 2. "No, I have not but if a special opportunity arose to do so I would consider it" | 9.4%             | 8.9%             | 7.0%                |
| <b>--Yes prior/present aspiration</b><br>--No present likelihood                        | 3. "Yes, I have but I do not realistically think it will happen"                    | 19.3%            | 13.3%            | 13.3%               |
| <b>--Yes, prior/present aspiration</b><br>--Yes potential aspiration                    | 4. "Yes, I have and if a special opportunity arose to do so I would consider it"    | 18.9%            | 9.5%             | 11.7%               |
| <b>--Yes prior/present aspiration</b><br>--Yes present desire                           | 5. "Yes, I have and I want to find a way to make it happen someday"                 | 6.9%             | 2.9%             | 5.0%                |
| <b>--Yes prior/present aspiration</b><br>--Yes present likelihood<br>--Yes present plan | 6. "Yes, I have and have already begun making plans to do so"                       | 1.7%             | 0.6%             | 0.0%                |
| <b>N=848</b>                                                                            |                                                                                     | N=233<br>(27.5%) | N=315<br>(37.1%) | N=300<br>(35.4%)    |

\* Chi-square ( $X^2$ ) = 36.718,  $p < .001$ .

**Table A-4a:**  
**Very Strong American National Identity (Dummy) and Aspiration**

|                                                                                  |                                                                                     | Not Very Strong American ID | Very Strong American ID |
|----------------------------------------------------------------------------------|-------------------------------------------------------------------------------------|-----------------------------|-------------------------|
| --No prior/present aspiration<br>--No present likelihood                         | 1. "No, I have not and realistically do not expect to do so"                        | 30.6%                       | 63.0%                   |
| --No, prior/present aspiration<br>--Yes potential aspiration                     | 2. "No, I have not but if a special opportunity arose to do so I would consider it" | 14.0%                       | 7.4%                    |
| --Yes prior/present aspiration<br>--No present likelihood                        | 3. "Yes, I have but I do not realistically think it will happen"                    | 19.0%                       | 14.3%                   |
| --Yes, prior/present aspiration<br>--Yes potential aspiration                    | 4. "Yes, I have and if a special opportunity arose to do so I would consider it"    | 19.0%                       | 11.8%                   |
| --Yes prior/present aspiration<br>--Yes present desire                           | 5. "Yes, I have and I want to find a way to make it happen someday"                 | 15.7%                       | 3.1%                    |
| --Yes prior/present aspiration<br>--Yes present likelihood<br>--Yes present plan | 6. "Yes, I have and have already begun making plans to do so"                       | 1.7%                        | 0.5%                    |
| <b>N=869</b>                                                                     |                                                                                     | N=121<br>(13.9%)            | N=748<br>(86.1%)        |

\* Chi-square ( $\chi^2$ ) = 66.395,  $p < .001$ .

**Table A-4b:**  
**Strength of American National Identity and Aspiration**

|                                                                                  |                                                                                     | Not at all      | Not very strongly | Somewhat strongly | Very strongly    |
|----------------------------------------------------------------------------------|-------------------------------------------------------------------------------------|-----------------|-------------------|-------------------|------------------|
| --No prior/present aspiration<br>--No present likelihood                         | 1. "No, I have not and realistically do not expect to do so"                        | 25.0%           | 33.3%             | 31.1%             | 63.0%            |
| --No, prior/present aspiration<br>--Yes potential aspiration                     | 2. "No, I have not but if a special opportunity arose to do so I would consider it" | 0.0%            | 13.3%             | 14.6%             | 7.4%             |
| --Yes prior/present aspiration<br>--No present likelihood                        | 3. "Yes, I have but I do not realistically think it will happen"                    | 0.0%            | 13.3%             | 19.4%             | 14.3%            |
| --Yes, prior/present aspiration<br>--Yes potential aspiration                    | 4. "Yes, I have and if a special opportunity arose to do so I would consider it"    | 0.0%            | 20.0%             | 20.4%             | 11.8%            |
| --Yes prior/present aspiration<br>--Yes present desire                           | 5. "Yes, I have and I want to find a way to make it happen someday"                 | 50.0%           | 13.3%             | 13.6%             | 3.1%             |
| --Yes prior/present aspiration<br>--Yes present likelihood<br>--Yes present plan | 6. "Yes, I have and have already begun making plans to do so"                       | 25.0%           | 6.7%              | 1.0%              | 0.5%             |
| <b>N=869</b>                                                                     |                                                                                     | N=4<br>(100.0%) | N=15<br>(100.0%)  | N=103<br>(100.0%) | N=748<br>(86.0%) |

\* Chi-square ( $\chi^2$ ) = 110.718,  $p < .001$ .

**Table A-5:  
Level of Education and Aspiration**

|                                                                                  |                                                                                     | Less than a High School Degree | HS Degree        | Bachelor's Degree or Higher |
|----------------------------------------------------------------------------------|-------------------------------------------------------------------------------------|--------------------------------|------------------|-----------------------------|
| --No prior/present aspiration<br>--No present likelihood                         | 1. "No, I have not and realistically do not expect to do so"                        | 79.8%                          | 63.4%            | 40.6%                       |
| --No, prior/present aspiration<br>--Yes potential aspiration                     | 2. "No, I have not but if a special opportunity arose to do so I would consider it" | 3.4%                           | 7.4%             | 12.2%                       |
| --Yes prior/present aspiration<br>--No present likelihood                        | 3. "Yes, I have but I do not realistically think it will happen"                    | 9.0%                           | 13.6%            | 19.3%                       |
| --Yes, prior/present aspiration<br>--Yes potential aspiration                    | 4. "Yes, I have and if a special opportunity arose to do so I would consider it"    | 2.2%                           | 10.4%            | 21.7%                       |
| --Yes prior/present aspiration<br>--Yes present desire                           | 5. "Yes, I have and I want to find a way to make it happen someday"                 | 5.6%                           | 4.9%             | 4.3%                        |
| --Yes prior/present aspiration<br>--Yes present likelihood<br>--Yes present plan | 6. "Yes, I have and have already begun making plans to do so"                       | 0.0%                           | 0.2%             | 2.0%                        |
| N=871                                                                            |                                                                                     | N=89<br>(10.2%)                | N=528<br>(60.6%) | N=254<br>(29.2%)            |

\* Chi-square ( $\chi^2$ ) = 71.138,  $p < .001$ .

**Table A-6:  
Internet Access in the Household (Dummy) and Aspiration**

|                                                                                  |                                                                                     | No, no Internet Access in the Household | Yes, Internet Access in the Household |
|----------------------------------------------------------------------------------|-------------------------------------------------------------------------------------|-----------------------------------------|---------------------------------------|
| --No prior/present aspiration<br>--No present likelihood                         | 1. "No, I have not and realistically do not expect to do so"                        | 72.9%                                   | 54.5%                                 |
| --No, prior/present aspiration<br>--Yes potential aspiration                     | 2. "No, I have not but if a special opportunity arose to do so I would consider it" | 5.3%                                    | 9.2%                                  |
| --Yes prior/present aspiration<br>--No present likelihood                        | 3. "Yes, I have but I do not realistically think it will happen"                    | 12.8%                                   | 15.5%                                 |
| --Yes, prior/present aspiration<br>--Yes potential aspiration                    | 4. "Yes, I have and if a special opportunity arose to do so I would consider it"    | 3.7%                                    | 15.2%                                 |
| --Yes prior/present aspiration<br>--Yes present desire                           | 5. "Yes, I have and I want to find a way to make it happen someday"                 | 1.6%                                    | 0.4%                                  |
| --Yes prior/present aspiration<br>--Yes present likelihood<br>--Yes present plan | 6. "Yes, I have and have already begun making plans to do so"                       | 1.6%                                    | 0.4%                                  |
| N=871                                                                            |                                                                                     | N=188<br>(21.6%)                        | N=683<br>(78.4%)                      |

\* Chi-square ( $\chi^2$ ) = 30.749,  $p < .001$ .

**Table A-7:**  
**Knowledge of Foreign Languages (Dummy) and Aspiration**

|                                                                                  |                                                                                     | <b>No, speaks only English</b> | <b>Yes, speaks at least 1 foreign language other than English</b> |
|----------------------------------------------------------------------------------|-------------------------------------------------------------------------------------|--------------------------------|-------------------------------------------------------------------|
| --No prior/present aspiration<br>--No present likelihood                         | 1. "No, I have not and realistically do not expect to do so"                        | 62.3%                          | 40.6%                                                             |
| --No, prior/present aspiration<br>--Yes potential aspiration                     | 2. "No, I have not but if a special opportunity arose to do so I would consider it" | 8.4%                           | 9.0%                                                              |
| --Yes prior/present aspiration<br>--No present likelihood                        | 3. "Yes, I have but I do not realistically think it will happen"                    | 14.1%                          | 18.7%                                                             |
| --Yes, prior/present aspiration<br>--Yes potential aspiration                    | 4. "Yes, I have and if a special opportunity arose to do so I would consider it"    | 10.5%                          | 23.2%                                                             |
| --Yes prior/present aspiration<br>--Yes present desire                           | 5. "Yes, I have and I want to find a way to make it happen someday"                 | 3.9%                           | 8.4%                                                              |
| --Yes prior/present aspiration<br>--Yes present likelihood<br>--Yes present plan | 6. "Yes, I have and have already begun making plans to do so"                       | 0.8%                           | 0.0%                                                              |
| <b>N=871</b>                                                                     |                                                                                     | <b>N=716<br/>(82.2%)</b>       | <b>N=155<br/>(17.8%)</b>                                          |

\* Chi-square ( $\chi^2$ ) = 35.067,  $p < .001$ .

**Table A-8:**  
**Passport Ownership (Dummy) and Aspiration**

|                                                                                  |                                                                                     | <b>No, not passport owner</b> | <b>Yes, passport owner</b> |
|----------------------------------------------------------------------------------|-------------------------------------------------------------------------------------|-------------------------------|----------------------------|
| --No prior/present aspiration<br>--No present likelihood                         | 1. "No, I have not and realistically do not expect to do so"                        | 71.0%                         | 44.7%                      |
| --No, prior/present aspiration<br>--Yes potential aspiration                     | 2. "No, I have not but if a special opportunity arose to do so I would consider it" | 6.7%                          | 10.5%                      |
| --Yes prior/present aspiration<br>--No present likelihood                        | 3. "Yes, I have but I do not realistically think it will happen"                    | 12.4%                         | 17.6%                      |
| --Yes, prior/present aspiration<br>--Yes potential aspiration                    | 4. "Yes, I have and if a special opportunity arose to do so I would consider it"    | 5.3%                          | 20.9%                      |
| --Yes prior/present aspiration<br>--Yes present desire                           | 5. "Yes, I have and I want to find a way to make it happen someday"                 | 4.7%                          | 5.0%                       |
| --Yes prior/present aspiration<br>--Yes present likelihood<br>--Yes present plan | 6. "Yes, I have and have already begun making plans to do so"                       | 0.0%                          | 0.7%                       |
| <b>N=872</b>                                                                     |                                                                                     | <b>N=451<br/>(51.7%)</b>      | <b>N=421<br/>(48.3%)</b>   |

\* Chi-square ( $\chi^2$ ) = 66.395,  $p < .001$ .

**Table A-9a:  
Prior Tourism Experience (Dummy) and Aspiration**

|                                                                                  |                                                                                     | Have Not Toured Abroad | Have Toured Abroad |
|----------------------------------------------------------------------------------|-------------------------------------------------------------------------------------|------------------------|--------------------|
| --No prior/present aspiration<br>--No present likelihood                         | 1. "No, I have not and realistically do not expect to do so"                        | 73.2%                  | 51.8%              |
| --No, prior/present aspiration<br>--Yes potential aspiration                     | 2. "No, I have not but if a special opportunity arose to do so I would consider it" | 5.9%                   | 9.7%               |
| --Yes prior/present aspiration<br>--No present likelihood                        | 3. "Yes, I have but I do not realistically think it will happen"                    | 10.7%                  | 16.7%              |
| --Yes, prior/present aspiration<br>--Yes potential aspiration                    | 4. "Yes, I have and if a special opportunity arose to do so I would consider it"    | 5.5%                   | 16.2%              |
| --Yes prior/present aspiration<br>--Yes present desire                           | 5. "Yes, I have and I want to find a way to make it happen someday"                 | 4.4%                   | 4.8%               |
| --Yes prior/present aspiration<br>--Yes present likelihood<br>--Yes present plan | 6. "Yes, I have and have already begun making plans to do so"                       | 0.4%                   | 0.8%               |
| N=871                                                                            |                                                                                     | N=272<br>(31.2%)       | N=599<br>(68.8%)   |

\* Chi-square ( $\chi^2$ ) = 39.703,  $p < .001$ .

**Table A-9b:  
Prior Tourism Experience and Aspiration**

|                                                                                  |                                                                                     | Never traveled abroad | 1-2              | 3-5              | 6-10            | 11-20          | 20+ Foreign countries |
|----------------------------------------------------------------------------------|-------------------------------------------------------------------------------------|-----------------------|------------------|------------------|-----------------|----------------|-----------------------|
| --No prior/present aspiration<br>--No present likelihood                         | 1. "No, I have not and realistically do not expect to do so"                        | 73.2%                 | 49.3%            | 49.3%            | 42.3%           | 33.3%          | 25.0%                 |
| --No, prior/present aspiration<br>--Yes potential aspiration                     | 2. "No, I have not but if a special opportunity arose to do so I would consider it" | 5.9%                  | 8.9%             | 10.4%            | 13.4%           | 0.0%           | 10.7%                 |
| --Yes prior/present aspiration<br>--No present likelihood                        | 3. "Yes, I have but I do not realistically think it will happen"                    | 10.7%                 | 15.6%            | 19.4%            | 15.5%           | 15.4%          | 25.0%                 |
| --Yes, prior/present aspiration<br>--Yes potential aspiration                    | 4. "Yes, I have and if a special opportunity arose to do so I would consider it"    | 5.5%                  | 9.9%             | 17.2%            | 21.6%           | 35.9%          | 35.7%                 |
| --Yes prior/present aspiration<br>--Yes present desire                           | 5. "Yes, I have and I want to find a way to make it happen someday"                 | 4.4%                  | 5.0%             | 3.0%             | 6.2%            | 10.3%          | 3.6%                  |
| --Yes prior/present aspiration<br>--Yes present likelihood<br>--Yes present plan | 6. "Yes, I have and have already begun making plans to do so"                       | 0.4%                  | 0.3%             | 0.7%             | 1.0%            | 5.1%           | 0.0%                  |
| N=871                                                                            |                                                                                     | N=272<br>(31.2%)      | N=302<br>(34.6%) | N=134<br>(15.4%) | N=97<br>(11.1%) | N=39<br>(4.5%) | N=28<br>(3.2%)        |

\* Chi-square ( $\chi^2$ ) = 107.187,  $p < .001$ .

**Table A-10a:**  
**Prior Living Abroad Experience (Dummy) and Aspiration**

|                                                                                  |                                                                                     | Have Not Lived Abroad | Have Lived Abroad |
|----------------------------------------------------------------------------------|-------------------------------------------------------------------------------------|-----------------------|-------------------|
| --No prior/present aspiration<br>--No present likelihood                         | 1. "No, I have not and realistically do not expect to do so"                        | 62.3%                 | 36.3%             |
| --No, prior/present aspiration<br>--Yes potential aspiration                     | 2. "No, I have not but if a special opportunity arose to do so I would consider it" | 8.3%                  | 9.6%              |
| --Yes prior/present aspiration<br>--No present likelihood                        | 3. "Yes, I have but I do not realistically think it will happen"                    | 13.7%                 | 21.5%             |
| --Yes, prior/present aspiration<br>--Yes potential aspiration                    | 4. "Yes, I have and if a special opportunity arose to do so I would consider it"    | 11.2%                 | 22.2%             |
| --Yes prior/present aspiration<br>--Yes present desire                           | 5. "Yes, I have and I want to find a way to make it happen someday"                 | 4.1%                  | 8.9%              |
| --Yes prior/present aspiration<br>--Yes present likelihood<br>--Yes present plan | 6. "Yes, I have and have already begun making plans to do so"                       | 0.4%                  | 1.5%              |
| <b>N=871</b>                                                                     |                                                                                     | N=735<br>(84.5%)      | N=135<br>(15.5%)  |

\* Chi-square ( $\chi^2$ ) = 36.651,  $p < .001$ .

**Table A-10b:**  
**Prior Living Abroad Experience and Aspiration**

|                                                                                  |                                                                                     | Never lived abroad | 1-2              | 3-5            | 6-10          | 11-20         | 20+ Foreign countries |
|----------------------------------------------------------------------------------|-------------------------------------------------------------------------------------|--------------------|------------------|----------------|---------------|---------------|-----------------------|
| --No prior/present aspiration<br>--No present likelihood                         | 1. "No, I have not and realistically do not expect to do so"                        | 62.3%              | 37.3%            | 28.6%          | 50.0%         | --            | 0.0%                  |
| --No, prior/present aspiration<br>--Yes potential aspiration                     | 2. "No, I have not but if a special opportunity arose to do so I would consider it" | 8.3%               | 9.3%             | 7.1%           | 0.0%          | --            | 8.4%                  |
| --Yes prior/present aspiration<br>--No present likelihood                        | 3. "Yes, I have but I do not realistically think it will happen"                    | 13.7%              | 22.0%            | 14.3%          | 50.0%         | --            | 50.0%                 |
| --Yes, prior/present aspiration<br>--Yes potential aspiration                    | 4. "Yes, I have and if a special opportunity arose to do so I would consider it"    | 11.2%              | 21.2%            | 28.6%          | 0.0%          | --            | 50.0%                 |
| --Yes prior/present aspiration<br>--Yes present desire                           | 5. "Yes, I have and I want to find a way to make it happen someday"                 | 4.1%               | 8.5%             | 14.3%          | 0.0%          | --            | 0.0%                  |
| --Yes prior/present aspiration<br>--Yes present likelihood<br>--Yes present plan | 6. "Yes, I have and have already begun making plans to do so"                       | 0.4%               | 1.7%             | 7.1%           | 0.0%          | --            | 0.0%                  |
| <b>N=871</b>                                                                     |                                                                                     | N=735<br>(84.4%)   | N=118<br>(13.5%) | N=14<br>(1.6%) | N=2<br>(0.2%) | N=0<br>(0.0%) | N=2<br>(0.2%)         |

\* Chi-square ( $\chi^2$ ) = 39.703,  $p < .001$ .



**Table A-11:  
Mean Household Income and Aspiration**

|                                                                                         |                                                                                     | <b>Below<br/>\$25K</b> | <b>\$25,000-<br/>\$74,999</b> | <b>\$75,000-<br/>\$124,000</b> | <b>\$125,000-<br/>\$174,999</b> | <b>\$175K and<br/>above</b> |
|-----------------------------------------------------------------------------------------|-------------------------------------------------------------------------------------|------------------------|-------------------------------|--------------------------------|---------------------------------|-----------------------------|
| <b>--No prior/present aspiration</b><br>--No present likelihood                         | 1. "No, I have not and realistically do not expect to do so"                        | 70.2%                  | 61.2%                         | 50.4%                          | 46.1%                           | 54.2%                       |
| <b>--No, prior/present aspiration</b><br>--Yes potential aspiration                     | 2. "No, I have not but if a special opportunity arose to do so I would consider it" | 6.2%                   | 7.3%                          | 11.3%                          | 10.5%                           | 6.3%                        |
| <b>--Yes prior/present aspiration</b><br>--No present likelihood                        | 3. "Yes, I have but I do not realistically think it will happen"                    | 10.6%                  | 15.9%                         | 17.4%                          | 15.8%                           | 10.4%                       |
| <b>--Yes, prior/present aspiration</b><br>--Yes potential aspiration                    | 4. "Yes, I have and if a special opportunity arose to do so I would consider it"    | 7.5%                   | 10.6%                         | 14.8%                          | 21.1%                           | 27.1%                       |
| <b>--Yes prior/present aspiration</b><br>--Yes present desire                           | 5. "Yes, I have and I want to find a way to make it happen someday"                 | 5.6%                   | 4.5%                          | 5.2%                           | 5.3%                            | 0.0%                        |
| <b>--Yes prior/present aspiration</b><br>--Yes present likelihood<br>--Yes present plan | 6. "Yes, I have and have already begun making plans to do so"                       | 0.0%                   | 0.6%                          | 0.9%                           | 1.3%                            | 2.1%                        |
| <b>N=873</b>                                                                            |                                                                                     | N=161<br>(18.4%)       | N=358<br>(41.0%)              | N=230<br>(26.3%)               | N=76<br>(8.7%)                  | N=48<br>(5.5%)              |

\* Chi-square ( $\chi^2$ ) = 40.294,  $p < .01$ .

**Table A-12:  
Employment Status (Dummy) and Aspiration**

|                                                                                         |                                                                                     | <b>Not Employed</b> | <b>Employed (full or part-time)</b> |
|-----------------------------------------------------------------------------------------|-------------------------------------------------------------------------------------|---------------------|-------------------------------------|
| <b>--No prior/present aspiration</b><br>--No present likelihood                         | 1. "No, I have not and realistically do not expect to do so"                        | 68.5%               | 49.8%                               |
| <b>--No, prior/present aspiration</b><br>--Yes potential aspiration                     | 2. "No, I have not but if a special opportunity arose to do so I would consider it" | 2.5%                | 6.0%                                |
| <b>--Yes prior/present aspiration</b><br>--No present likelihood                        | 3. "Yes, I have but I do not realistically think it will happen"                    | 6.2%                | 8.7%                                |
| <b>--Yes, prior/present aspiration</b><br>--Yes potential aspiration                    | 4. "Yes, I have and if a special opportunity arose to do so I would consider it"    | 3.4%                | 9.4%                                |
| <b>--Yes prior/present aspiration</b><br>--Yes present desire                           | 5. "Yes, I have and I want to find a way to make it happen someday"                 | 2.2%                | 2.5%                                |
| <b>--Yes prior/present aspiration</b><br>--Yes present likelihood<br>--Yes present plan | 6. "Yes, I have and have already begun making plans to do so"                       | 0.3%                | 1.1%                                |
| <b>N=874</b>                                                                            |                                                                                     | N=400<br>(45.9%)    | N=472<br>(54.1%)                    |

\* Chi-square ( $\chi^2$ ) = 40.232,  $p < .001$ .

**Table A-13:  
Homeownership Status (Dummy) and Aspiration**

|                                                                                  |                                                                                     | <b>Not a Homeowner</b>   | <b>Homeowner</b>         |
|----------------------------------------------------------------------------------|-------------------------------------------------------------------------------------|--------------------------|--------------------------|
| --No prior/present aspiration<br>--No present likelihood                         | 1. "No, I have not and realistically do not expect to do so"                        | 54.2%                    | 60.1%                    |
| --No, prior/present aspiration<br>--Yes potential aspiration                     | 2. "No, I have not but if a special opportunity arose to do so I would consider it" | 7.5%                     | 8.9%                     |
| --Yes prior/present aspiration<br>--No present likelihood                        | 3. "Yes, I have but I do not realistically think it will happen"                    | 13.3%                    | 15.5%                    |
| --Yes, prior/present aspiration<br>--Yes potential aspiration                    | 4. "Yes, I have and if a special opportunity arose to do so I would consider it"    | 16.3%                    | 11.4%                    |
| --Yes prior/present aspiration<br>--Yes present desire                           | 5. "Yes, I have and I want to find a way to make it happen someday"                 | 7.9%                     | 3.5%                     |
| --Yes prior/present aspiration<br>--Yes present likelihood<br>--Yes present plan | 6. "Yes, I have and have already begun making plans to do so"                       | 0.8%                     | 0.6%                     |
| <b>N=871</b>                                                                     |                                                                                     | <b>N=240<br/>(27.6%)</b> | <b>N=631<br/>(72.4%)</b> |

\* Chi-square ( $\chi^2$ ) = 12.259,  $p < .05$ .

**Table A-14:  
Household Structure (Dummy) and Aspiration**

|                                                                                  |                                                                                     | <b>No Children under 18 living in the Household</b> | <b>1+ Children under 18 living in the Household</b> |
|----------------------------------------------------------------------------------|-------------------------------------------------------------------------------------|-----------------------------------------------------|-----------------------------------------------------|
| --No prior/present aspiration<br>--No present likelihood                         | 1. "No, I have not and realistically do not expect to do so"                        | 61.0%                                               | 50.5%                                               |
| --No, prior/present aspiration<br>--Yes potential aspiration                     | 2. "No, I have not but if a special opportunity arose to do so I would consider it" | 7.5%                                                | 11.2%                                               |
| --Yes prior/present aspiration<br>--No present likelihood                        | 3. "Yes, I have but I do not realistically think it will happen"                    | 13.9%                                               | 18.2%                                               |
| --Yes, prior/present aspiration<br>--Yes potential aspiration                    | 4. "Yes, I have and if a special opportunity arose to do so I would consider it"    | 12.5%                                               | 14.0%                                               |
| --Yes prior/present aspiration<br>--Yes present desire                           | 5. "Yes, I have and I want to find a way to make it happen someday"                 | 4.3%                                                | 6.1%                                                |
| --Yes prior/present aspiration<br>--Yes present likelihood<br>--Yes present plan | 6. "Yes, I have and have already begun making plans to do so"                       | 0.9%                                                | 0.0%                                                |
| <b>N=871</b>                                                                     |                                                                                     | <b>N=657<br/>(75.4%)</b>                            | <b>N=214<br/>(24.6%)</b>                            |

\* Chi-square ( $\chi^2$ ) = 11.250,  $p < .05$ .

**Table A-15:  
Immigrant Heritage (Dummy) and Aspiration**

|                                                                                  |                                                                                     | <b>No Such Ancestry Reported</b> | <b>2<sup>nd</sup>-4<sup>th</sup> Generation<br/>Immigrant Ancestry</b> |
|----------------------------------------------------------------------------------|-------------------------------------------------------------------------------------|----------------------------------|------------------------------------------------------------------------|
| --No prior/present aspiration<br>--No present likelihood                         | 1. "No, I have not and realistically do not expect to do so"                        | 64.0%                            | 48.3%                                                                  |
| --No, prior/present aspiration<br>--Yes potential aspiration                     | 2. "No, I have not but if a special opportunity arose to do so I would consider it" | 7.2%                             | 10.9%                                                                  |
| --Yes prior/present aspiration<br>--No present likelihood                        | 3. "Yes, I have but I do not realistically think it will happen"                    | 15.0%                            | 14.6%                                                                  |
| --Yes, prior/present aspiration<br>--Yes potential aspiration                    | 4. "Yes, I have and if a special opportunity arose to do so I would consider it"    | 9.2%                             | 19.5%                                                                  |
| --Yes prior/present aspiration<br>--Yes present desire                           | 5. "Yes, I have and I want to find a way to make it happen someday"                 | 3.9%                             | 6.3%                                                                   |
| --Yes prior/present aspiration<br>--Yes present likelihood<br>--Yes present plan | 6. "Yes, I have and have already begun making plans to do so"                       | 0.7%                             | 0.3%                                                                   |
| <b>N=869</b>                                                                     |                                                                                     | N=567<br>(65.2%)                 | N=302<br>(34.8%)                                                       |

\* Chi-square ( $\chi^2$ ) = 30.935,  $p < .001$ .

**Table A-16:  
Social Networks (Dummy) and Aspiration**

|                                                                                  |                                                                                     | <b>No such social networks<br/>reported</b> | <b>Yes, has social networks with<br/>other U.S. citizens who have<br/>lived abroad</b> |
|----------------------------------------------------------------------------------|-------------------------------------------------------------------------------------|---------------------------------------------|----------------------------------------------------------------------------------------|
| --No prior/present aspiration<br>--No present likelihood                         | 1. "No, I have not and realistically do not expect to do so"                        | 70.4%                                       | 41.9%                                                                                  |
| --No, prior/present aspiration<br>--Yes potential aspiration                     | 2. "No, I have not but if a special opportunity arose to do so I would consider it" | 5.5%                                        | 12.3%                                                                                  |
| --Yes prior/present aspiration<br>--No present likelihood                        | 3. "Yes, I have but I do not realistically think it will happen"                    | 13.2%                                       | 17.3%                                                                                  |
| --Yes, prior/present aspiration<br>--Yes potential aspiration                    | 4. "Yes, I have and if a special opportunity arose to do so I would consider it"    | 6.9%                                        | 21.1%                                                                                  |
| --Yes prior/present aspiration<br>--Yes present desire                           | 5. "Yes, I have and I want to find a way to make it happen someday"                 | 3.6%                                        | 6.3%                                                                                   |
| --Yes prior/present aspiration<br>--Yes present likelihood<br>--Yes present plan | 6. "Yes, I have and have already begun making plans to do so"                       | 0.4%                                        | 1.1%                                                                                   |
| <b>N=871</b>                                                                     |                                                                                     | N=506<br>(58.1%)                            | N=365<br>(41.9%)                                                                       |

\* Chi-square ( $\chi^2$ ) = 81.376,  $p < .001$ .

## B. Geographic and Temporal Dimensions of Aspiration

**Table B-1a:**  
**Very Strong American National Identity (Dummy) and**  
**Canada as Geographic Preference of Aspiration**

|            | Not Very Strong American ID | Very Strong American ID |
|------------|-----------------------------|-------------------------|
| Not Canada | 82.9%                       | 93.3%                   |
| Canada     | 17.1%                       | 6.7%                    |
| N=351      | N=82<br>(23.4%)             | N=269<br>(76.6%)        |

\* Chi-square ( $X^2$ ) = 8.175,  $p < .01$ .

**Table B-1b:**  
**Strength of American National Identity and**  
**Canada as Geographic Preference of Aspiration**

|            | Not at all    | Not very strongly | Somewhat strongly | Very strongly    |
|------------|---------------|-------------------|-------------------|------------------|
| Not Canada | 100.0%        | 77.8%             | 82.9%             | 93.3%            |
| Canada     | 0.0%          | 22.2%             | 17.1%             | 6.7%             |
|            | N=3<br>(0.9%) | N=9<br>(2.6%)     | N=70<br>(19.9%)   | N=269<br>(76.6%) |

\* Chi-square ( $X^2$ ) = 9.519,  $p < .05$ .

**Table B-2a:**  
**Prior Tourism Experience and**  
**Canada as Geographic Preference of Aspiration**

|            | Never traveled abroad | 1-2   | 3-5   | 6-10  | 11-20  | 20+ Foreign countries |
|------------|-----------------------|-------|-------|-------|--------|-----------------------|
| Not Canada | 92.5%                 | 85.3% | 90.0% | 96.4% | 100.0% | 100.0%                |
| Canada     | 7.5%                  | 14.7% | 9.1%  | 3.6%  | 0.0%   | 0.0%                  |
|            |                       |       |       |       |        |                       |

\* Chi-square ( $X^2$ ) = 11.628,  $p < .05$ .

**Table B-2b:**  
**Prior Tourism Experience (Dummy) and**  
**Canada as Geographic Preference of Aspiration**

|            | Have Not Toured Abroad | Have Toured Abroad |
|------------|------------------------|--------------------|
| Not Canada | 92.5%                  | 90.8%              |
| Canada     | 7.5%                   | 9.2%               |
| N=351      | N=67<br>(19.1%)        | N=284<br>(80.9%)   |

\* Chi-square ( $X^2$ ) = .193,  $p < NS$ .

**Table B-3:**  
**Race/Ethnicity and**  
**Western Europe, Australia, or New Zealand as Geographic Preference of Aspiration**

|                                           | Nonwhite         | White, non-Hispanic |
|-------------------------------------------|------------------|---------------------|
| Other                                     | 51.9%            | 33.1%               |
| Western Europe, Australia, or New Zealand | 48.1%            | 66.9%               |
| N=353                                     | N=108<br>(30.6%) | N=245<br>(69.4%)    |

\* Chi-square ( $X^2$ ) = 11.145,  $p < .001$ .

**Table B-4:**  
**Social Networks (Dummy) and**  
**Western Europe, Australia, or New Zealand as Geographic Preference of Aspiration**

|                                           |                                           | No such social networks reported | Yes, has social networks with other U.S. citizens who have lived abroad |
|-------------------------------------------|-------------------------------------------|----------------------------------|-------------------------------------------------------------------------|
| Other                                     | Other                                     | 47.6%                            | 32.7%                                                                   |
| Western Europe, Australia, or New Zealand | Western Europe, Australia, or New Zealand | 52.4%                            | 67.3%                                                                   |
| N=353                                     |                                           | N=145<br>(41.1%)                 | N=208<br>(58.9%)                                                        |

\* Chi-square ( $X^2$ ) = 7.981,  $p < .01$ .

**Table B-5:**  
**Age (by Decade) and**  
**Latin America as Geographic Preference of Aspiration**

|                                                   | 18-25           | 26-35           | 36-45           | 46-55           | 56-65           | 66-75          | 76+           |
|---------------------------------------------------|-----------------|-----------------|-----------------|-----------------|-----------------|----------------|---------------|
| Other                                             | 84.9%           | 86.9%           | 73.1%           | 69.8%           | 64.3%           | 79.2%          | 60.0%         |
| Latin America or the Caribbean (including Mexico) | 15.1%           | 13.1%           | 26.9%           | 30.2%           | 35.7%           | 20.8%          | 40.0%         |
| N=352                                             | N=86<br>(24.4%) | N=61<br>(17.3%) | N=67<br>(19.0%) | N=53<br>(15.1%) | N=56<br>(15.9%) | N=24<br>(6.8%) | N=5<br>(1.4%) |

\* Chi-square ( $X^2$ ) = 13.700,  $p < .05$ .

**Table B-6:**  
**Level of Education and**  
**Latin America as Geographic Preference of Aspiration**

|                                                   | Less than a High School Degree | HS Degree        | Bachelor's Degree or Higher |
|---------------------------------------------------|--------------------------------|------------------|-----------------------------|
| Other                                             | 52.6%                          | 74.6%            | 82.6%                       |
| Latin America or the Caribbean (including Mexico) | 47.4%                          | 25.4%            | 17.4%                       |
| N=353                                             | N=19<br>(5.4%)                 | N=185<br>(52.4%) | N=149<br>(42.2%)            |

\* Chi-square ( $X^2$ ) = 9.490,  $p < .01$ .

**Table B-7:**  
**Internet Access in the Household (Dummy) and**  
**Latin America as Geographic Preference of Aspiration**

|                                                   | No, no Internet Access in the Household | Yes, Internet Access in the Household |
|---------------------------------------------------|-----------------------------------------|---------------------------------------|
| Other                                             | 51.9%                                   | 33.1%                                 |
| Latin America or the Caribbean (including Mexico) | 48.1%                                   | 66.9%                                 |
| N=353                                             | N=51<br>(14.4%)                         | N=302<br>(85.6%)                      |

\* Chi-square ( $X^2$ ) = 4.866,  $p < .05$ .

**Table B-8:**  
**Homeownership (Dummy) and**  
**Latin America as Geographic Preference of Aspiration**

|                                                   | Not a homeowner  | Homeowner        |
|---------------------------------------------------|------------------|------------------|
| Other                                             | 86.1%            | 72.7%            |
| Latin America or the Caribbean (including Mexico) | 13.9%            | 27.3%            |
| N=353                                             | N=108<br>(30.6%) | N=245<br>(69.4%) |

\* Chi-square ( $X^2$ ) = 7.613,  $p < .01$ .

**Table B-9:**  
**Household Structure (Dummy) and**  
**Latin America as Geographic Preference of Aspiration**

|                                                   | Not Living with a Partner | Living with a Partner (Married or Cohabiting) |
|---------------------------------------------------|---------------------------|-----------------------------------------------|
| Other                                             | 83.1%                     | 71.4%                                         |
| Latin America or the Caribbean (including Mexico) | 16.9%                     | 28.6%                                         |
| N=352                                             | N=160<br>(45.5%)          | N=192<br>(54.5%)                              |

\* Chi-square ( $X^2$ ) = 6.767,  $p < .01$ .

**Table B-10:**  
**Social Networks (Dummy) and**  
**Latin America as Geographic Preference of Aspiration**

|                                                   | No such social networks reported | Yes, has social networks with other U.S. citizens who have lived abroad |
|---------------------------------------------------|----------------------------------|-------------------------------------------------------------------------|
| Other                                             | 70.3%                            | 81.3%                                                                   |
| Latin America or the Caribbean (including Mexico) | 29.7%                            | 18.8%                                                                   |
| N=353                                             | N=145<br>(41.1%)                 | N=208<br>(58.9%)                                                        |

\* Chi-square ( $X^2$ ) = 5.698,  $p < .05$ .

**Table B-11:**  
**Age (by Decade) and Timing Preference of Aspiration**

|                  | 18-25           | 26-35           | 36-45           | 46-55           | 56-65           | 66-75          | 76+           |
|------------------|-----------------|-----------------|-----------------|-----------------|-----------------|----------------|---------------|
| 1 Year or less   | 60.0%           | 46.8%           | 32.8%           | 46.3%           | 57.9%           | 52.0%          | 60.0%         |
| More than 1 year | 40.0%           | 53.2%           | 67.2%           | 53.7%           | 42.1%           | 48.0%          | 40.0%         |
| N=360            | N=90<br>(25.0%) | N=62<br>(17.2%) | N=67<br>(18.6%) | N=54<br>(15.0%) | N=57<br>(15.8%) | N=25<br>(6.9%) | N=5<br>(1.45) |

\* Chi-square ( $X^2$ ) = 13.700,  $p < .05$ .

**Table B-12a:**  
**Past Living Abroad Experience (Dummy) and**  
**Timing Preference of Aspiration**

|                  | Have not Lived Abroad | Have Lived Abroad |
|------------------|-----------------------|-------------------|
| 1 Year or less   | 52.5%                 | 40.5%             |
| More than 1 year | 47.5%                 | 59.5%             |
| N=360            | N=276<br>(76.7%)      | N=84<br>(23.3%)   |

\* Chi-square ( $X^2$ ) = 3.747,  $p < .05$ .

**Table B-12b:**  
**Prior Living Abroad Experience and**  
**Timing Preference of Aspiration**

|                  | Never lived abroad | 1-2             | 3-5           | 6-10          | 11-20         | 20+ Foreign countries |
|------------------|--------------------|-----------------|---------------|---------------|---------------|-----------------------|
| 1 Year or less   | 52.5%              | 44.4%           | 22.2%         | 0.0%          | 0.0%          | 49.7%                 |
| More than 1 year | 40.3%              | 8.9%            | 0.6%          | 0.0%          | 0.0%          | 50.3%                 |
| N=360            | N=276<br>(76.7%)   | N=72<br>(20.0%) | N=9<br>(2.5%) | N=1<br>(0.3%) | N=2<br>(0.6%) |                       |

\* Chi-square ( $X^2$ ) = 7.366,  $p < .NS$ .

**Table B-13:**  
**Rating of the Health of the U.S. Economy and**  
**Timing Preference of Aspiration**

|                         | Poor             | Fair             | Good            | Excellent     |
|-------------------------|------------------|------------------|-----------------|---------------|
| <b>1 Year or less</b>   | 40.2%            | 60.7%            | 45.9%           | 20.0%         |
| <b>More than 1 year</b> | 59.8%            | 39.3%            | 54.1%           | 80.0%         |
| <b>N=351</b>            | N=122<br>(34.8%) | N=163<br>(46.4%) | N=61<br>(17.4%) | N=5<br>(1.4%) |

\* Chi-square ( $X^2$ ) = 14.422,  $p < .001$ .

**Table B-14:**  
**Household Structure (Dummy) and Timing Preference of Aspiration**

|                         | Not Living with a Partner | Living with a Partner (Married or Cohabiting) |
|-------------------------|---------------------------|-----------------------------------------------|
| <b>1 Year or less</b>   | 57.6%                     | 43.3%                                         |
| <b>More than 1 year</b> | 42.4%                     | 56.7%                                         |
| <b>N=359</b>            | N=165<br>(46.0%)          | N=194<br>(54.0%)                              |

\* Chi-square ( $X^2$ ) = 7.270,  $p < .01$ .

**Table B-15:**  
**Military Service (Dummy) and**  
**Timing Preference of Aspiration**

|                         | No such social networks reported | Yes, has social networks with other U.S. citizens who have lived abroad |
|-------------------------|----------------------------------|-------------------------------------------------------------------------|
| <b>1 Year or less</b>   | 51.9%                            | 33.3%                                                                   |
| <b>More than 1 year</b> | 48.1%                            | 66.7%                                                                   |
| <b>N=357</b>            | N=312<br>(87.4%)                 | N=45<br>(12.6%)                                                         |

\* Chi-square ( $X^2$ ) = 5.437,  $p < .01$ .



### *C. Motivations for Aspiration:*

**Table C-1:  
Age (by Decade) and To Work Motivation**

|                               | <b>18-25</b>    | <b>26-35</b>    | <b>36-45</b>    | <b>46-55</b>    | <b>56-65</b>    | <b>66-75</b>   | <b>76+</b>    |
|-------------------------------|-----------------|-----------------|-----------------|-----------------|-----------------|----------------|---------------|
| <b>To work not ranked</b>     | 34.4%           | 41.3%           | 49.3%           | 59.3%           | 71.9%           | 76.0%          | 80.0%         |
| <b>To work ranked Top 1-3</b> | 65.6%           | 58.7%           | 50.7%           | 40.7%           | 28.1%           | 24.0%          | 20.0%         |
| <b>N=352</b>                  | N=90<br>(24.9%) | N=63<br>(17.5%) | N=67<br>(15.0%) | N=54<br>(15.8%) | N=57<br>(15.8%) | N=25<br>(6.9%) | N=5<br>(1.4%) |

\* Chi-square ( $X^2$ ) = 31.718,  $p < .001$ .

**Table C-2:  
Gender and To Work Motivation**

|                               | <b>Female</b>    | <b>Male</b>      |
|-------------------------------|------------------|------------------|
| <b>To work not ranked</b>     | 56.6%            | 46.2%            |
| <b>To work ranked Top 1-3</b> | 43.4%            | 53.8%            |
| <b>N=362</b>                  | N=189<br>(52.2%) | N=173<br>(47.8%) |

\* Chi-square ( $X^2$ ) = 3.890,  $p < .05$ .

**Table C-3:  
Midwest U.S. Region of Residence (Dummy) and To Work Motivation**

|                               | <b>Not Midwest</b> | <b>Midwest</b>  |
|-------------------------------|--------------------|-----------------|
| <b>To work not ranked</b>     | 55.4%              | 37.0%           |
| <b>To work ranked Top 1-3</b> | 44.6%              | 63.0%           |
| <b>N=362</b>                  | N=289<br>(100.0%)  | N=73<br>(20.2%) |

\* Chi-square ( $X^2$ ) = 10.858,  $p < .05$ .

**Table C-4:  
Internet Access in Household (Dummy) and To Work Motivation**

|                               | <b>No Internet Access in Household</b> | <b>Internet Access in Household</b> |
|-------------------------------|----------------------------------------|-------------------------------------|
| <b>To work not ranked</b>     | 64.7%                                  | 49.5%                               |
| <b>To work ranked Top 1-3</b> | 35.3%                                  | 50.5%                               |
| <b>N=362</b>                  | N=51<br>(14.1%)                        | N=311<br>(85.9%)                    |

\* Chi-square ( $X^2$ ) = 4.047,  $p < .05$ .

**Table C-5:  
Homeownership (Dummy) and To Work Motivation**

|                               | <b>Not a Homeowner</b> | <b>Homeowner</b> |
|-------------------------------|------------------------|------------------|
| <b>To work not ranked</b>     | 43.6%                  | 55.2%            |
| <b>To work ranked Top 1-3</b> | 56.4%                  | 44.8%            |
| <b>N=362</b>                  | N=110<br>(30.4%)       | N=252<br>(69.6%) |

\* Chi-square ( $X^2$ ) = 4.071,  $p < .05$ .

**Table C-6:  
Military Service (Dummy) and To Work Motivation**

|                        | No Military Service | Prior or Current Military Service |
|------------------------|---------------------|-----------------------------------|
| To work not ranked     | 50.2%               | 65.2%                             |
| To work ranked Top 1-3 | 49.8%               | 34.8%                             |
| N=359                  | N=313<br>(87.2%)    | N=45<br>(12.8%)                   |

\* Chi-square ( $X^2$ ) = 3.644,  $p < .05$ .

**Table C-7:  
Age (by Decade) and To Study Motivation**

|                         | 18-25           | 26-35           | 36-45           | 46-55           | 56-65           | 66-75          | 76+           |
|-------------------------|-----------------|-----------------|-----------------|-----------------|-----------------|----------------|---------------|
| To study not ranked     | 53.8%           | 69.8%           | 76.1%           | 76.4%           | 66.7%           | 65.4%          | 25.0%         |
| To study ranked Top 1-3 | 46.2%           | 30.2%           | 23.9%           | 23.6%           | 33.5%           | 34.0%          | 75.0%         |
| N=363                   | N=91<br>(25.1%) | N=63<br>(17.4%) | N=67<br>(18.5%) | N=55<br>(15.2%) | N=57<br>(15.7%) | N=26<br>(7.2%) | N=4<br>(1.1%) |

\* Chi-square ( $X^2$ ) = 15.182,  $p < .05$ .

**Table C-8a:  
Very Strong American National Identity (Dummy) and  
To Study Motivation**

|                         | Not Very Strong American ID | Very Strong American ID |
|-------------------------|-----------------------------|-------------------------|
| To study not ranked     | 77.4%                       | 63.5%                   |
| To study ranked Top 1-3 | 22.6%                       | 36.5%                   |
| N=361                   | N=84<br>(23.3%)             | N=277<br>(76.7%)        |

\* Chi-square ( $X^2$ ) = 5.566,  $p < .05$ .

**Table C-8b:  
Strength of American National Identity and  
To Study Motivation**

|                         | Not at all    | Not very strongly | Somewhat strongly | Very strongly    |
|-------------------------|---------------|-------------------|-------------------|------------------|
| To study not ranked     | 66.7%         | 80.0%             | 77.8%             | 63.5%            |
| To study ranked Top 1-3 | 33.3%         | 20.0%             | 22.2%             | 36.5%            |
| N=362                   | N=3<br>(0.8%) | N=10<br>(2.8%)    | N=72<br>(19.9%)   | N=277<br>(76.5%) |

\* Chi-square ( $X^2$ ) = 6.031,  $p < NS$ .

**Table C-9:  
Employment (Dummy) and To Study Motivation**

|                         | Not Employed     | Employed Full or Part-time |
|-------------------------|------------------|----------------------------|
| To study not ranked     | 60.0%            | 70.5%                      |
| To study ranked Top 1-3 | 40.0%            | 29.5%                      |
| N=362                   | N=125<br>(34.5%) | N=237<br>(65.5%)           |

\* Chi-square ( $X^2$ ) = 4.044,  $p < .05$ .

**Table C-10:**  
**Rating of the Health of the U.S. Economy and**  
**To Study Motivation**

|                         | Poor             | Fair             | Good            | Excellent     |
|-------------------------|------------------|------------------|-----------------|---------------|
| To study not ranked     | 74.4%            | 58.5%            | 77.0%           | 40.0%         |
| To study ranked Top 1-3 | 25.6%            | 41.5%            | 23.0%           | 60.0%         |
| N=355                   | N=125<br>(35.2%) | N=164<br>(46.2%) | N=61<br>(17.2%) | N=5<br>(1.4%) |

\* Chi-square ( $X^2$ ) = 12.852,  $p < .01$ .

**Table C-11:**  
**Household Structure (Dummy) and**  
**To Study Motivation**

|                         | Not Living with a Partner | Living with a Partner (Married or Cohabiting) |
|-------------------------|---------------------------|-----------------------------------------------|
| To study not ranked     | 57.2%                     | 75.1%                                         |
| To study ranked Top 1-3 | 42.8%                     | 24.9%                                         |
| N=363                   | N=166<br>(45.7%)          | N=197<br>(54.3%)                              |

\* Chi-square ( $X^2$ ) = 13.041,  $p < .001$ .

**Table C-12:**  
**Gender (Dummy) and**  
**To Join a Partner Motivation**

|                                  | Female           | Male             |
|----------------------------------|------------------|------------------|
| To join a partner not ranked     | 76.8%            | 84.9%            |
| To join a partner ranked Top 1-3 | 23.2%            | 15.1%            |
| N=362                            | N=190<br>(52.5%) | N=172<br>(47.5%) |

\* Chi-square ( $X^2$ ) = 3.743,  $p < .05$ .

**Table C-13:**  
**Race/Ethnicity (Dummy) and**  
**To Join a Partner Motivation**

|                                  | Nonwhite         | White, Non-Hispanic |
|----------------------------------|------------------|---------------------|
| To join a partner not ranked     | 71.2%            | 84.9%               |
| To join a partner ranked Top 1-3 | 28.8%            | 15.1%               |
| N=362                            | N=111<br>(30.7%) | N=251<br>(69.3%)    |

\* Chi-square ( $X^2$ ) = 9.247,  $p < .01$ .

**Table C-14:**  
**West U.S. Region of Residence (Dummy) and**  
**To Join a Partner Motivation**

|                                         | <b>Not West</b>  | <b>West</b>     |
|-----------------------------------------|------------------|-----------------|
| <b>To join a partner not ranked</b>     | 83.3%            | 72.4%           |
| <b>To join a partner ranked Top 1-3</b> | 16.7%            | 27.6%           |
| <b>N=362</b>                            | N=275<br>(76.0%) | N=87<br>(24.0%) |

\* Chi-square ( $X^2$ ) = 4.996,  $p < .05$ .

**Table C-15:**  
**Homeownership (Dummy) and To Join a Partner Motivation**

|                                         | <b>Not a Homeowner</b> | <b>Homeowner</b> |
|-----------------------------------------|------------------------|------------------|
| <b>To join a partner not ranked</b>     | 72.7%                  | 84.1%            |
| <b>To join a partner ranked Top 1-3</b> | 27.3%                  | 15.9%            |
| <b>N=362</b>                            | N=110<br>(30.4%)       | N=252<br>(69.6%) |

\* Chi-square ( $X^2$ ) = 6.380,  $p < .01$ .

**Table C-16:**  
**Age (by Decade) and To Retire Motivation**

|                                 | <b>18-25</b>    | <b>26-35</b>    | <b>36-45</b>    | <b>46-55</b>    | <b>56-65</b>    | <b>66-75</b>   | <b>76+</b>    |
|---------------------------------|-----------------|-----------------|-----------------|-----------------|-----------------|----------------|---------------|
| <b>To retire not ranked</b>     | 82.2%           | 57.8%           | 43.3%           | 25.5%           | 26.3%           | 32.0%          | 40.0%         |
| <b>To retire ranked Top 1-3</b> | 17.8%           | 42.2%           | 56.7%           | 74.5%           | 73.7%           | 68.0%          | 60.0%         |
| <b>N=363</b>                    | N=90<br>(24.8%) | N=64<br>(17.6%) | N=67<br>(18.5%) | N=55<br>(15.2%) | N=57<br>(15.7%) | N=25<br>(6.9%) | N=5<br>(1.4%) |

\* Chi-square ( $X^2$ ) = 69.578,  $p < .001$ .

**Table C-17a:**  
**Very Strong American National Identity (Dummy) and**  
**To Retire Motivation**

|                                 | <b>Not Very Strong American ID</b> | <b>Very Strong American ID</b> |
|---------------------------------|------------------------------------|--------------------------------|
| <b>To retire not ranked</b>     | 61.9%                              | 45.7%                          |
| <b>To retire ranked Top 1-3</b> | 38.1%                              | 54.3%                          |
| <b>N=362</b>                    | N=84<br>(23.2%)                    | N=278<br>(76.8%)               |

\* Chi-square ( $X^2$ ) = 11.728,  $p < NS$ .

**Table C-17b:  
Strength of American National Identity and  
To Retire Motivation**

|                                 | Not at all    | Not very strongly | Somewhat strongly | Very strongly    |
|---------------------------------|---------------|-------------------|-------------------|------------------|
| <b>To retire not ranked</b>     | 0.0%          | 50.0%             | 65.3%             | 45.7%            |
| <b>To retire ranked Top 1-3</b> | 100.0%        | 50.0%             | 34.7%             | 54.3%            |
| <b>N=363</b>                    | N=3<br>(0.8%) | N=10<br>(2.8%)    | N=72<br>(19.8%)   | N=278<br>(76.6%) |

\* Chi-square ( $X^2$ ) = 6.790,  $p < .01$ .

**Table C-18a:  
Prior Tourism Experience (Dummy) and To Retire Motivation**

|                                 | Have Not Toured Abroad | Have Toured Abroad |
|---------------------------------|------------------------|--------------------|
| <b>To retire not ranked</b>     | 60.3%                  | 46.2%              |
| <b>To retire ranked Top 1-3</b> | 39.7%                  | 53.8%              |
| <b>N=361</b>                    | N=73<br>(20.2%)        | N=288<br>(79.8%)   |

\* Chi-square ( $X^2$ ) = .113,  $p < .05$ .

**Table C-18b:  
Prior Tourism Experience and To Retire Motivation**

|                                 | Never traveled abroad | 1-2              | 3-5             | 6-10            | 11-20          | 20+ Foreign countries |
|---------------------------------|-----------------------|------------------|-----------------|-----------------|----------------|-----------------------|
| <b>To retire not ranked</b>     | 60.3%                 | 55.9%            | 41.2%           | 47.3%           | 26.9%          | 30.0%                 |
| <b>To retire ranked Top 1-3</b> | 39.7%                 | 44.1%            | 58.8%           | 52.7%           | 73.1%          | 70.0%                 |
| <b>N=360</b>                    | N=73<br>(20.3%)       | N=118<br>(32.8%) | N=68<br>(18.9%) | N=55<br>(15.3%) | N=26<br>(7.2%) | N=20<br>(5.6%)        |

\* Chi-square ( $X^2$ ) = 15.667,  $p < .01$ .

**Table C-19:  
Homeownership (Dummy) and To Retire Motivation**

|                                 | Not a Homeowner  | Homeowner        |
|---------------------------------|------------------|------------------|
| <b>To retire not ranked</b>     | 60.9%            | 44.0%            |
| <b>To retire ranked Top 1-3</b> | 39.1%            | 56.0%            |
| <b>N=362</b>                    | N=110<br>(30.4%) | N=252<br>(69.6%) |

\* Chi-square ( $X^2$ ) = 8.711,  $p < .01$ .

**Table C-20:  
Household Structure (Dummy) and  
To Retire Motivation**

|                                 | <b>Not Living with a Partner</b> | <b>Living with a Partner (Married or Cohabiting)</b> |
|---------------------------------|----------------------------------|------------------------------------------------------|
| <b>To retire not ranked</b>     | 66.3%                            | 35.0%                                                |
| <b>To retire ranked Top 1-3</b> | 33.7%                            | 65.0%                                                |
| <b>N=363</b>                    | N=166<br>(45.7%)                 | N=197<br>(54.35)                                     |

\* Chi-square ( $X^2$ ) = 35.174,  $p < .001$ .

**Table C-21:  
Household Structure (Dummy) and  
To Retire Motivation**

|                                 | <b>No Children under 18 living in the Household</b> | <b>1+ Children under 18 living in the Household</b> |
|---------------------------------|-----------------------------------------------------|-----------------------------------------------------|
| <b>To retire not ranked</b>     | 45.9%                                               | 57.0%                                               |
| <b>To retire ranked Top 1-3</b> | 54.1%                                               | 43.0%                                               |
| <b>N=362</b>                    | N=255<br>(100.0%)                                   | N=107<br>(29.6%)                                    |

\* Chi-square ( $X^2$ ) = 3.734,  $p < .05$ .

**Table C-22:  
Military Service (Dummy) and To Retire Motivation**

|                                 | <b>No Military Service</b> | <b>Prior or Current Military Service</b> |
|---------------------------------|----------------------------|------------------------------------------|
| <b>To retire not ranked</b>     | 52.4%                      | 25.5%                                    |
| <b>To retire ranked Top 1-3</b> | 41.4%                      | 74.5%                                    |
| <b>N=360</b>                    | N=313<br>(86.9%)           | N=47<br>(13.1%)                          |

\* Chi-square ( $X^2$ ) = 11.802,  $p < .001$ .

**Table C-23:  
Race/Ethnicity (Dummy) and  
To Explore Motivation**

|                                  | <b>Nonwhite</b>  | <b>White, Non-Hispanic</b> |
|----------------------------------|------------------|----------------------------|
| <b>To explore not ranked</b>     | 23.4%            | 7.6%                       |
| <b>To explore ranked Top 1-3</b> | 76.6%            | 92.4%                      |
| <b>N=361</b>                     | N=111<br>(30.7%) | N=250<br>(69.3%)           |

\* Chi-square ( $X^2$ ) = 17.639,  $p < .001$ .

**Table C-24a:**  
**Very Strong American National Identity (Dummy) and**  
**To Explore Motivation**

|                           | Not Very Strong American ID | Very Strong American ID |
|---------------------------|-----------------------------|-------------------------|
| To explore not ranked     | 9.5%                        | 13.4%                   |
| To explore ranked Top 1-3 | 90.5%                       | 86.6%                   |
| N=361                     | N=84<br>(23.3%)             | N=277<br>(76.7%)        |

\* Chi-square ( $X^2$ ) = .868,  $p < \text{NS}$ .

**Table C-24b:**  
**Strength of American National Identity and**  
**To Explore Motivation**

|                           | Not at all    | Not very strongly | Somewhat strongly | Very strongly    |
|---------------------------|---------------|-------------------|-------------------|------------------|
| To explore not ranked     | 66.7%         | 30.0%             | 5.6%              | 13.4%            |
| To explore ranked Top 1-3 | 33.3%         | 70.0%             | 94.4%             | 86.6%            |
| N=362                     | N=3<br>(0.8%) | N=10<br>(2.8%)    | N=72<br>(19.9%)   | N=277<br>(76.5%) |

\* Chi-square ( $X^2$ ) = 13.996,  $p < .01$ .

**Table C-25a:**  
**Prior Living Abroad Experience (Dummy) and To Explore Motivation**

|                           | Have Not Lived Abroad | Have Lived Abroad |
|---------------------------|-----------------------|-------------------|
| To explore not ranked     | 12.3%                 | 14.0%             |
| To explore ranked Top 1-3 | 87.7%                 | 86.0%             |
| N=361                     | N=277<br>(76.3%)      | N=86<br>(23.7%)   |

\* Chi-square ( $X^2$ ) = .167,  $p < \text{NS}$ .

**Table C-25b:**  
**Prior Living Abroad Experience and To Explore Motivation**

|                           | Never lived abroad | 1-2             | 3-5           | 6-10          | 11-20         | 20+ Foreign countries |
|---------------------------|--------------------|-----------------|---------------|---------------|---------------|-----------------------|
| To explore not ranked     | 12.3%              | 10.8%           | 22.2%         | 100.0%        | 0.0%          | 50.0%                 |
| To explore ranked Top 1-3 | 87.7%              | 89.2%           | 77.8%         | 0.0%          | 0.0%          | 50.0%                 |
| N=361                     | N=277<br>(76.3%)   | N=74<br>(20.4%) | N=9<br>(2.5%) | N=1<br>(0.3%) | N=0<br>(0.0%) | N=2<br>(0.6%)         |

\* Chi-square ( $X^2$ ) = 10.423,  $p < .05$ .

**Table C-26a:**  
**Very Strong American National Identity (Dummy) and**  
**To Leave a Bad Situation in the U.S. Motivation**

|                         | Not Very Strong American ID | Very Strong American ID |
|-------------------------|-----------------------------|-------------------------|
| To leave not ranked     | 31.0%                       | 57.4%                   |
| To leave ranked Top 1-3 | 69.0%                       | 42.6%                   |
| N=361                   | N=84<br>(23.3%)             | N=277<br>(76.7%)        |

\* Chi-square ( $X^2$ ) = 18.046,  $p < .001$ .

**Table C-26b:**  
**Strength of American National Identity and**  
**To Leave a Bad Situation in the U.S. Motivation**

|                         | Not at all    | Not very strongly | Somewhat strongly | Very strongly    |
|-------------------------|---------------|-------------------|-------------------|------------------|
| To leave not ranked     | 100.0%        | 0.0%              | 32.4%             | 57.4%            |
| To leave ranked Top 1-3 | 0.0%          | 100.0%            | 67.6%             | 42.6%            |
| N=361                   | N=3<br>(0.8%) | N=10<br>(2.8%)    | N=71<br>(19.7%)   | N=277<br>(76.7%) |

\* Chi-square ( $X^2$ ) = 27.664,  $p < .001$ .

**Table C-27:**  
**Level of Education and**  
**To Leave a Bad Situation in the U.S. Motivation**

|                         | Less than a High School Degree | HS Degree        | Bachelor's Degree or Higher |
|-------------------------|--------------------------------|------------------|-----------------------------|
| To leave not ranked     | 57.9%                          | 44.0%            | 58.7%                       |
| To leave ranked Top 1-3 | 42.1%                          | 56.0%            | 41.3%                       |
| N=362                   | N=19<br>(5.2%)                 | N=193<br>(53.3%) | N=150<br>(41.4%)            |

\* Chi-square ( $X^2$ ) = 7.624,  $p < .05$ .

**Table C-28:**  
**Passport Ownership (Dummy) and**  
**To Leave a Bad Situation in the U.S. Motivation**

|                         | No, not passport owner | Yes, passport owner |
|-------------------------|------------------------|---------------------|
| To leave not ranked     | 38.0%                  | 58.4%               |
| To leave ranked Top 1-3 | 62.0%                  | 41.6%               |
| N=362                   | N=129<br>(35.6%)       | N=233<br>(64.4%)    |

\* Chi-square ( $X^2$ ) = 13.087,  $p < .001$ .



**Table C-29a:**  
**Prior Tourism Experience (Dummy) and**  
**To Leave a Bad Situation in the U.S. Motivation**

|                                | Have Not Traveled Abroad | Have Traveled Abroad |
|--------------------------------|--------------------------|----------------------|
| <b>To leave not ranked</b>     | 38.4%                    | 54.5%                |
| <b>To leave ranked Top 1-3</b> | 61.6%                    | 45.5%                |
| <b>N=361</b>                   | N=73<br>(20.2%)          | N=288<br>(79.8%)     |

\* Chi-square ( $X^2$ ) = 6.086,  $p < \text{NS}$ .

**Table C-29b:**  
**Prior Tourism Experience and**  
**To Leave a Bad Situation in the U.S. Motivation**

|                                | Never<br>traveled<br>abroad | 1-2              | 3-5             | 6-10            | 11-20          | 20+<br>Foreign<br>countries |
|--------------------------------|-----------------------------|------------------|-----------------|-----------------|----------------|-----------------------------|
| <b>To leave not ranked</b>     | 38.4%                       | 47.1%            | 57.4%           | 58.2%           | 65.4%          | 66.7%                       |
| <b>To leave ranked Top 1-3</b> | 61.6%                       | 52.9%            | 42.6%           | 41.8%           | 34.6%          | 33.3%                       |
| <b>N=362</b>                   | N=73<br>(20.2%)             | N=119<br>(32.9%) | N=68<br>(18.8%) | N=55<br>(15.2%) | N=26<br>(7.2%) | N=21<br>(5.8%)              |

\* Chi-square ( $X^2$ ) = 11.842,  $p < .05$ .

**Table C-30:**  
**Rating of the Health of the U.S. Economy and**  
**To Leave a Bad Situation in the U.S. Motivation**

|                                | Poor             | Fair             | Good            | Excellent     |
|--------------------------------|------------------|------------------|-----------------|---------------|
| <b>To leave not ranked</b>     | 32.8%            | 60.4%            | 62.3%           | 66.7%         |
| <b>To leave ranked Top 1-3</b> | 67.2%            | 39.6%            | 37.7%           | 33.3%         |
| <b>N=356</b>                   | N=125<br>(35.1%) | N=164<br>(46.1%) | N=61<br>(17.1%) | N=6<br>(1.7%) |

\* Chi-square ( $X^2$ ) = 26.029,  $p < .001$ .
